# Supplementary material for: Malaria risk factors in northern Namibia: The importance of occupation, age and mobility in characterizing high-risk populations
Source: PubMed Central journal article supplement (PMC8232432; doi:10.1371/journal.pone.0252690), 2021-06-25
Supplement: pone.0252690.s001.pdf [file pone.0252690.s001.pdf]

S1 Table. Potential environmental covariates

| Covariate                           | Description                         | Units/scale      | Spatial resolution | Temporal resolution                 | Source                                                                                         |
|-------------------------------------|-------------------------------------|------------------|--------------------|-------------------------------------|------------------------------------------------------------------------------------------------|
| Precipitation                       | Total precipitation in              | Millimeters (mm) | ~5 km              | Monthly                             | Climate Hazards Group InfraRed Precipitation with Station (CHIRPS)                             |
| EVI                                 | Enhanced Vegetation Index           | -                | 1 km               | 8 day composites averaged for month | Moderate Resolution Imaging Spectroradiometer (MODIS)                                          |
| Temperature (day)                   | Mean land surface temperature (day) | Degrees Celsius  | 1 km               | 8 day composites averaged for month | Moderate Resolution Imaging Spectroradiometer (MODIS)                                          |
| Elevation                           | Average height above sea level      | Meters           | 90 m               | -                                   | Shuttle Radar Topography Mission [ <a href="http://srtm.usgs.gov/">http://srtm.usgs.gov/</a> ] |
| Distance to nearest health facility | Euclidean distance to road          | Kilometers       | 1 km               | -                                   | Derived using R and health facility shapefile                                                  |
| Distance to border                  | Euclidean distance to border        | Kilometers       | 1 km               | -                                   | Derived using R and country shapefile                                                          |
