# Supplementary material for: Malaria risk factors in northern Namibia: The importance of occupation, age and mobility in characterizing high-risk populations
Source: PubMed Central journal article supplement (PMC8232432; doi:10.1371/journal.pone.0252690), 2021-06-25
Supplement: pone.0252690.s002.pdf [file pone.0252690.s002.pdf]

| S2 Table. Number, percent and univariate analysis for all measured exposures |       |      |          |      |                                 |            |                   |
|------------------------------------------------------------------------------|-------|------|----------|------|---------------------------------|------------|-------------------|
| Characteristic                                                               | Cases |      | Controls |      | Unadjusted <sup>1</sup><br>Odds |            | P-value           |
|                                                                              | N     | (%)  | N        | (%)  | OR                              | 95% CI     |                   |
| <b>Socio-demographics</b>                                                    |       |      |          |      |                                 |            |                   |
| Foreign citizenship                                                          | 129   | 16.8 | 60       | 9.4  | 2.25                            | (1.6-3.2)  | <b>&lt;0.0001</b> |
| Education level                                                              |       |      |          |      |                                 |            |                   |
| Secondary & above                                                            | 163   | 21.2 | 183      | 28.6 | 1                               | -          | -                 |
| Primary                                                                      | 399   | 51.8 | 271      | 42.3 | 1.64                            | (1.2-2.3)  | <b>0.003</b>      |
| None                                                                         | 208   | 27.0 | 186      | 29.1 | 1.47                            | (1.0-2.1)  | <b>0.040</b>      |
| Water source                                                                 |       |      |          |      |                                 |            |                   |
| Open well                                                                    | 276   | 35.8 | 163      | 25.4 | 1                               | -          | -                 |
| In-residence tap                                                             | 31    | 4.0  | 122      | 19.0 | 0.30                            | (0.2-0.5)  | <b>&lt;0.0001</b> |
| Out of compound/closed                                                       | 394   | 51.2 | 334      | 52.1 | 0.79                            | (0.6-1.0)  | <b>0.096</b>      |
| Surface                                                                      | 69    | 9.0  | 22       | 3.4  | 2.07                            | (1.2-3.6)  | <b>0.011</b>      |
| Toilet type                                                                  |       |      |          |      |                                 |            |                   |
| None/open                                                                    | 754   | 97.9 | 613      | 95.6 | 1                               | -          | -                 |
| Any latrine                                                                  | 16    | 2.1  | 28       | 4.4  | 0.61                            | (0.3-1.3)  | 0.181             |
| Asset index (mean, sd) <sup>2</sup>                                          | -0.29 | 0.05 | 0.35     | 0.07 | 0.81                            | (0.8-0.9)  | <b>&lt;0.0001</b> |
| Owens cattle                                                                 | 137   | 17.8 | 190      | 29.6 | 0.57                            | (0.4-0.8)  | <b>&lt;0.0001</b> |
| Main Occupation (2 missing)                                                  |       |      |          |      |                                 |            |                   |
| Agricultural                                                                 | 106   | 13.8 | 165      | 25.8 | 1                               | -          | -                 |
| Cattle herder                                                                | 16    | 2.1  | 2        | 0.3  | 7.84                            | (1.8-35.8) | <b>0.007</b>      |
| Police/Ranger                                                                | 7     | 0.9  | 4        | 0.6  | 2.43                            | (0.7-9.0)  | 0.182             |
| Security guard                                                               | 4     | 0.5  | 2        | 0.3  | 2.85                            | (0.6-13.6) | 0.190             |
| Skilled/semi-skilled                                                         | 43    | 5.6  | 81       | 12.7 | 0.79                            | (0.5-1.3)  | 0.337             |
| Unemployed/Pensioner                                                         | 116   | 15.1 | 83       | 13.0 | 1.61                            | (1.1-2.5)  | <b>0.030</b>      |
| Child                                                                        | 274   | 35.6 | 215      | 33.6 | 2.41                            | (1.5-3.8)  | <b>&lt;0.0001</b> |
| Student                                                                      | 189   | 24.6 | 75       | 11.7 | 3.89                            | (2.5-6.0)  | <b>&lt;0.0001</b> |
| Other                                                                        | 14    | 1.8  | 13       | 2.0  | 1.52                            | (0.6-3.6)  | 0.352             |
| <b>Housing</b>                                                               |       |      |          |      |                                 |            |                   |
| House type                                                                   |       |      |          |      |                                 |            |                   |
| Modern                                                                       | 334   | 43.4 | 362      | 56.5 | 1                               | -          | -                 |
| Traditional                                                                  | 382   | 49.6 | 267      | 41.7 | 1.67                            | (1.3-2.1)  | <b>&lt;0.0001</b> |
| Tent                                                                         | 16    | 2.1  | 1        | 0.2  | 21.7                            | (3.0-157)  | <b>0.002</b>      |
| Open/no walls                                                                | 38    | 4.9  | 11       | 1.7  | 2.9                             | (1.4-6.0)  | <b>0.005</b>      |
| Open eaves                                                                   | 502   | 65.2 | 395      | 61.6 | 1.31                            | (1.0-1.7)  | <b>0.028</b>      |
| Sleeps near cattle                                                           | 91    | 11.8 | 158      | 24.7 | 1.35                            | (0.8-2.1)  | 0.231             |
| <b>Malaria prevention</b>                                                    |       |      |          |      |                                 |            |                   |

|                                                                  |     |      |     |      |      |           |                   |  |
|------------------------------------------------------------------|-----|------|-----|------|------|-----------|-------------------|--|
| Indoor residual spraying (1 missing)                             |     |      |     |      |      |           |                   |  |
| Never sprayed                                                    | 325 | 42.2 | 187 | 29.2 | 1    | -         | -                 |  |
| < 12 months                                                      | 341 | 44.3 | 364 | 56.9 | 0.49 | (0.4-0.6) | <b>&lt;0.0001</b> |  |
| One year or more                                                 | 29  | 3.8  | 41  | 6.4  | 0.42 | (0.3-0.7) | <b>0.001</b>      |  |
| Don't know                                                       | 75  | 9.7  | 48  | 7.5  | 0.86 | (0.5-1.3) | 0.496             |  |
| Adequate net coverage <sup>3</sup>                               | 130 | 16.9 | 209 | 32.6 | 0.44 | (0.3-0.6) | <b>&lt;0.0001</b> |  |
| Regular net use                                                  |     |      |     |      |      |           |                   |  |
| Never                                                            | 466 | 60.5 | 264 | 41.2 | 1    | -         | -                 |  |
| Sometimes                                                        | 61  | 7.9  | 85  | 13.3 | 0.56 | (0.4-0.8) | <b>0.004</b>      |  |
| Always                                                           | 243 | 31.6 | 292 | 45.6 | 0.47 | (0.4-0.6) | <b>&lt;0.0001</b> |  |
| Slept under net (7 missing)                                      | 266 | 34.8 | 304 | 47.6 | 0.56 | (0.4-0.7) | <b>&lt;0.0001</b> |  |
| <b>Outdoor activities between sunset and sunrise<sup>4</sup></b> |     |      |     |      |      |           |                   |  |
| Number of outdoor activities                                     |     |      |     |      |      |           |                   |  |
| None                                                             | 271 | 35.2 | 272 | 42.4 | 1    | -         | -                 |  |
| 1                                                                | 328 | 42.6 | 268 | 41.8 | 1.08 | (0.8-1.4) | 0.554             |  |
| 2+                                                               | 171 | 22.2 | 101 | 15.8 | 1.53 | (1.1-2.1) | <b>0.012</b>      |  |
| Timing of outdoor activities                                     |     |      |     |      |      |           |                   |  |
| None                                                             | 276 | 35.8 | 274 | 42.8 | 1    | -         | -                 |  |
| After sunset                                                     | 245 | 31.8 | 180 | 28.1 | 1.09 | (0.8-1.5) | 0.536             |  |
| Early morning                                                    | 65  | 8.4  | 71  | 11.1 | 1.14 | (0.8-1.8) | 0.526             |  |
| Early morning and after sunset                                   | 169 | 22.0 | 105 | 16.4 | 1.29 | (0.9-1.8) | 0.135             |  |
| Late evening/all night                                           | 15  | 2.0  | 11  | 1.7  | 1.34 | (0.6-3.1) | 0.498             |  |
| Frequency of (any) activities                                    |     |      |     |      |      |           |                   |  |
| None                                                             | 288 | 37.4 | 288 | 44.9 | 1    | -         | -                 |  |
| 1-6 times per week                                               | 178 | 23.1 | 138 | 21.5 | 1.17 | (0.9-1.6) | 0.319             |  |
| 7+ times per week                                                | 304 | 39.5 | 215 | 33.5 | 1.17 | (0.9-1.5) | 0.260             |  |
| Work (farming)                                                   | 718 | 93.3 | 609 | 95.0 | 1.90 | (1.2-3.0) | <b>0.006</b>      |  |
| Work (other)                                                     | 738 | 95.8 | 615 | 95.9 | 1.10 | (0.6-1.9) | 0.753             |  |
| Collecting water                                                 | 609 | 79.1 | 533 | 83.2 | 1.20 | (0.9-1.6) | 0.239             |  |
| Playing                                                          | 618 | 80.3 | 576 | 89.9 | 1.55 | (1.1-2.2) | <b>0.015</b>      |  |
| Visiting bars                                                    | 756 | 98.2 | 616 | 96.1 | 0.48 | (0.2-1.0) | <b>0.043</b>      |  |
| Studying                                                         | 742 | 96.4 | 620 | 96.7 | 1.2  | (0.6-2.3) | 0.530             |  |
| Weeding/fieldwork                                                | 737 | 95.7 | 614 | 95.8 | 1.0  | (0.6-1.8) | 0.908             |  |
| Cow herding                                                      | 760 | 98.7 | 636 | 99.2 | 1.21 | (0.4-3.4) | 0.718             |  |
| Slept outside (4 missing)                                        | 142 | 18.5 | 80  | 12.5 | 1.77 | (1.3-2.4) | <b>&lt;0.0001</b> |  |
| Use of bite prevention                                           | 28  | 3.6  | 43  | 6.7  | 0.45 | (0.3-0.8) | <b>0.003</b>      |  |
| <b>Migration and recent travel</b>                               |     |      |     |      |      |           |                   |  |
| Migration <sup>5</sup>                                           |     |      |     |      |      |           |                   |  |
| Not within past six months                                       | 693 | 90.0 | 594 | 92.7 | 1    | -         | -                 |  |

|                                                                                                                                                                                                                                                                                                                                                                                                                              |                          |     |      |     |      |       |            |                   |
|------------------------------------------------------------------------------------------------------------------------------------------------------------------------------------------------------------------------------------------------------------------------------------------------------------------------------------------------------------------------------------------------------------------------------|--------------------------|-----|------|-----|------|-------|------------|-------------------|
|                                                                                                                                                                                                                                                                                                                                                                                                                              | Domestic migration       | 37  | 4.8  | 34  | 5.3  | 1.10  | (0.6-1.9)  | 0.750             |
|                                                                                                                                                                                                                                                                                                                                                                                                                              | Cross-border migration   | 40  | 5.2  | 13  | 2.0  | 3.36  | (1.6-7.1)  | <b>0.002</b>      |
| Recent mobility <sup>6</sup>                                                                                                                                                                                                                                                                                                                                                                                                 |                          |     |      |     |      |       |            |                   |
|                                                                                                                                                                                                                                                                                                                                                                                                                              | None                     | 689 | 89.5 | 524 | 81.8 | 1     | -          | -                 |
|                                                                                                                                                                                                                                                                                                                                                                                                                              | Domestic (Low risk)      | 14  | 1.8  | 50  | 7.8  | 0.31  | (0.2-0.6)  | <b>&lt;0.0001</b> |
|                                                                                                                                                                                                                                                                                                                                                                                                                              | Domestic (High risk)     | 49  | 6.4  | 60  | 9.4  | 0.72  | (0.5-1.1)  | <b>0.14</b>       |
|                                                                                                                                                                                                                                                                                                                                                                                                                              | Cross-border             | 18  | 2.3  | 7   | 1.1  | 2.85  | (1.0-8.2)  | <b>0.05</b>       |
|                                                                                                                                                                                                                                                                                                                                                                                                                              | Used bednet during trip  | 11  | 1.4  | 21  | 3.3  | 0.59  | (0.3-1.3)  | 0.188             |
| Trip duration                                                                                                                                                                                                                                                                                                                                                                                                                |                          |     |      |     |      |       |            |                   |
|                                                                                                                                                                                                                                                                                                                                                                                                                              | No travel                | 689 | 89.5 | 524 | 81.8 | 1     | -          | -                 |
|                                                                                                                                                                                                                                                                                                                                                                                                                              | Less than 1 week         | 39  | 5.1  | 66  | 10.3 | 0.61  | (0.4-1.0)  | <b>0.030</b>      |
|                                                                                                                                                                                                                                                                                                                                                                                                                              | 1 – 4 weeks              | 23  | 3.0  | 46  | 7.2  | 0.46  | (0.3-0.8)  | <b>0.008</b>      |
|                                                                                                                                                                                                                                                                                                                                                                                                                              | 1 month or more          | 19  | 2.5  | 5   | 0.8  | 2.91  | (1.0-8.1)  | <b>0.043</b>      |
| <b>Environmental (68 missing)</b>                                                                                                                                                                                                                                                                                                                                                                                            |                          |     |      |     |      |       |            |                   |
| Distance to nearest health facility                                                                                                                                                                                                                                                                                                                                                                                          |                          |     |      |     |      |       |            |                   |
|                                                                                                                                                                                                                                                                                                                                                                                                                              | < 5 min                  | 244 | 33.7 | 301 | 48.7 | 1     | -          | -                 |
|                                                                                                                                                                                                                                                                                                                                                                                                                              | 5 – 14 min               | 272 | 37.5 | 183 | 29.6 | 1.54  | (1.2-2.1)  | <b>0.003</b>      |
|                                                                                                                                                                                                                                                                                                                                                                                                                              | ≥ 15 min                 | 209 | 28.8 | 134 | 21.7 | 1.90  | (1.4-2.6)  | <b>&lt;0.0001</b> |
|                                                                                                                                                                                                                                                                                                                                                                                                                              | Less than 10km to border | 287 | 39.6 | 177 | 28.6 | 1.40  | (1.0-1.9)  | <b>0.029</b>      |
| Enhanced vegetation index (EVI)                                                                                                                                                                                                                                                                                                                                                                                              |                          |     |      |     |      |       |            |                   |
|                                                                                                                                                                                                                                                                                                                                                                                                                              | <2500                    | 39  | 5.4  | 139 | 22.5 | 1     | -          | -                 |
|                                                                                                                                                                                                                                                                                                                                                                                                                              | 2500-4499                | 570 | 78.6 | 453 | 73.3 | 3.69  | (2.5-5.5)  | <b>&lt;0.0001</b> |
|                                                                                                                                                                                                                                                                                                                                                                                                                              | ≥4500                    | 116 | 16.0 | 26  | 4.2  | 11.55 | (6.5-20.4) | <b>&lt;0.0001</b> |
| Temperature tertiles                                                                                                                                                                                                                                                                                                                                                                                                         |                          |     |      |     |      |       |            |                   |
|                                                                                                                                                                                                                                                                                                                                                                                                                              | Lowest 1                 | 313 | 43.2 | 138 | 22.3 | 1     | -          | -                 |
|                                                                                                                                                                                                                                                                                                                                                                                                                              | 2                        | 200 | 27.6 | 253 | 40.9 | 0.26  | (0.2-0.4)  | <b>&lt;0.0001</b> |
|                                                                                                                                                                                                                                                                                                                                                                                                                              | Highest 3                | 212 | 29.2 | 227 | 36.7 | 0.43  | (0.3-0.6)  | <b>&lt;0.0001</b> |
| Elevation (m)                                                                                                                                                                                                                                                                                                                                                                                                                |                          |     |      |     |      |       |            |                   |
|                                                                                                                                                                                                                                                                                                                                                                                                                              | <960                     | 207 | 28.6 | 266 | 43.0 | 1     | -          | -                 |
|                                                                                                                                                                                                                                                                                                                                                                                                                              | 960-979                  | 284 | 39.2 | 209 | 33.8 | 0.90  | (0.6-1.3)  | 0.570             |
|                                                                                                                                                                                                                                                                                                                                                                                                                              | 980-1007                 | 233 | 32.2 | 143 | 23.1 | 0.89  | (0.6-1.4)  | 0.618             |
| Total rainfall (mm)                                                                                                                                                                                                                                                                                                                                                                                                          |                          |     |      |     |      |       |            |                   |
|                                                                                                                                                                                                                                                                                                                                                                                                                              | <70                      | 105 | 14.5 | 331 | 53.6 | 1     | -          | -                 |
|                                                                                                                                                                                                                                                                                                                                                                                                                              | 70-114                   | 270 | 37.2 | 186 | 30.1 | 4.32  | (3.2-5.9)  | <b>&lt;0.0001</b> |
|                                                                                                                                                                                                                                                                                                                                                                                                                              | 115-258                  | 350 | 48.3 | 101 | 16.3 | 10.75 | (7.6-15.0) | <b>&lt;0.0001</b> |
|                                                                                                                                                                                                                                                                                                                                                                                                                              | Second season (2016)     | 676 | 87.8 | 447 | 69.7 | 3.12  | (2.3-4.2)  | <b>&lt;0.0001</b> |
| <sup>1</sup> Estimates calculated using robust standard errors and adjusted for matching variables (age category, gender, calendar quarter), transmission season and health facility level. <sup>2</sup> First component, <sup>3</sup> At least 1 net per every 2 people in the household, <sup>4</sup> In the past 2 weeks, <sup>5</sup> Changed residence less than 6 months <sup>6</sup> Mobility within the past 30 days |                          |     |      |     |      |       |            |                   |
