# Supplementary material for: Malaria risk factors in northern Namibia: The importance of occupation, age and mobility in characterizing high-risk populations
Source: PubMed Central journal article supplement (PMC8232432; doi:10.1371/journal.pone.0252690), 2021-06-25
Supplement: pone.0252690.s003.pdf [file pone.0252690.s003.pdf]

S3 Table. Latent class analyses among malaria cases: probability of latent class membership and item-response probabilities within each of the six clusters

| Characteristic                                        | Class 1 (5)<br>Young children | Class 2 (6)<br>Namibian pensioners | Class 3 (5)<br>School-age children | Class 4 (3)<br>Students | Class 5 (1)<br>Outdoor exposures | Class 6 (3)<br>Agricultural exposures |
|-------------------------------------------------------|-------------------------------|------------------------------------|------------------------------------|-------------------------|----------------------------------|---------------------------------------|
| Probability of latent class membership within classes | 7.40%                         | 7.01%                              | 21.82%                             | 13.8%                   | 35.6%                            | 14.4%                                 |
| Agricultural worker                                   | 0.000                         | 0.111                              | 0.000                              | 0.000                   | 0.000                            | <b>0.900</b>                          |
| Cattle herder                                         | 0.000                         | 0.000                              | 0.000                              | 0.000                   | <b>0.058</b>                     | 0.000                                 |
| Child                                                 | <b>0.982</b>                  | 0.000                              | 1.000                              | 0.000                   | 0.183                            | 0.000                                 |
| Student                                               | 0.000                         | 0.000                              | 0.000                              | <b>1.000</b>            | <b>0.303</b>                     | 0.000                                 |
| Unemployed/Pensioner                                  | 0.000                         | <b>0.852</b>                       | 0.000                              | 0.000                   | <b>0.256</b>                     | 0.000                                 |
| Security guard                                        | 0.000                         | 0.000                              | 0.000                              | 0.000                   | <b>0.034</b>                     | 0.015                                 |
| Age category (years)                                  |                               |                                    |                                    |                         |                                  |                                       |
| 0-4                                                   | <b>1.000</b>                  | 0.000                              | 0.000                              | 0.000                   | 0.000                            | 0.000                                 |
| 5-14                                                  | 0.000                         | 0.074                              | <b>1.000</b>                       | <b>1.000</b>            | 0.000                            | 0.000                                 |
| 15-59                                                 | 0.000                         | 0.000                              | 0.000                              | 0.000                   | <b>1.000</b>                     | <b>1.000</b>                          |
| 60+                                                   | 0.000                         | <b>0.926</b>                       | 0.000                              | 0.000                   | 0.000                            | 0.000                                 |
| Male                                                  | 0.509                         | <b>0.296</b>                       | 0.524                              | 0.557                   | 0.577                            | 0.602                                 |
| Traditional home                                      | 0.509                         | 0.407                              | 0.429                              | 0.528                   | 0.500                            | 0.504                                 |
| Tent                                                  | 0.000                         | 0.019                              | 0.006                              | 0.009                   | <b>0.039</b>                     | 0.020                                 |
| No structure                                          | 0.053                         | 0.000                              | <b>0.095</b>                       | 0.047                   | 0.040                            | 0.027                                 |
| Slept under net                                       | 0.456                         | 0.477                              | 0.345                              | 0.311                   | <b>0.273</b>                     | <b>0.471</b>                          |
| Cross-border migrant                                  | <b>0.105</b>                  | 0.000                              | 0.048                              | 0.009                   | 0.053                            | <b>0.094</b>                          |
| Cross-border travel                                   | <b>0.053</b>                  | 0.019                              | 0.024                              | 0.009                   | 0.014                            | <b>0.048</b>                          |
| Outdoor activities at night                           |                               |                                    |                                    |                         |                                  |                                       |
| 2 or more                                             | <b>0.860</b>                  | 0.519                              | 0.363                              | 0.377                   | 0.282                            | 0.282                                 |
| Work (farming)                                        | 0.000                         | <b>0.204</b>                       | 0.000                              | 0.000                   | 0.000                            | <b>0.369</b>                          |
| Sleeping                                              | 0.211                         | 0.222                              | 0.181                              | 0.181                   | 0.122                            | <b>0.321</b>                          |
| Playing                                               | 0.123                         | 0.000                              | <b>0.518</b>                       | 0.292                   | 0.099                            | 0.000                                 |
| Bite prevention                                       | 0.018                         | <b>0.000</b>                       | 0.071                              | 0.057                   | 0.029                            | 0.009                                 |
